# Supplementary figures and images for: Design strategy for tautomerization-based small panchromatic molecules
Source: Royal Society of Chemistry journal article supplement (doi:10.1039/d5cc01507c), 2025-01-01

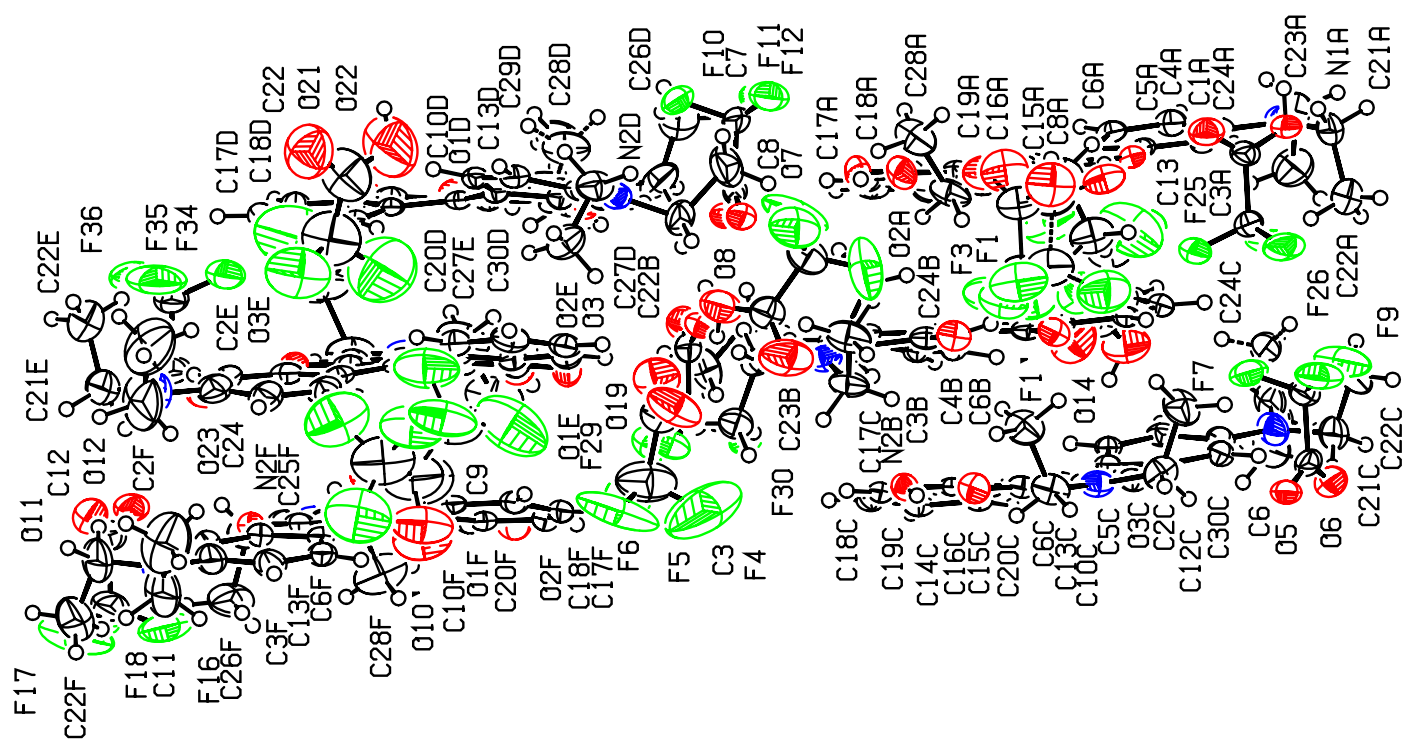

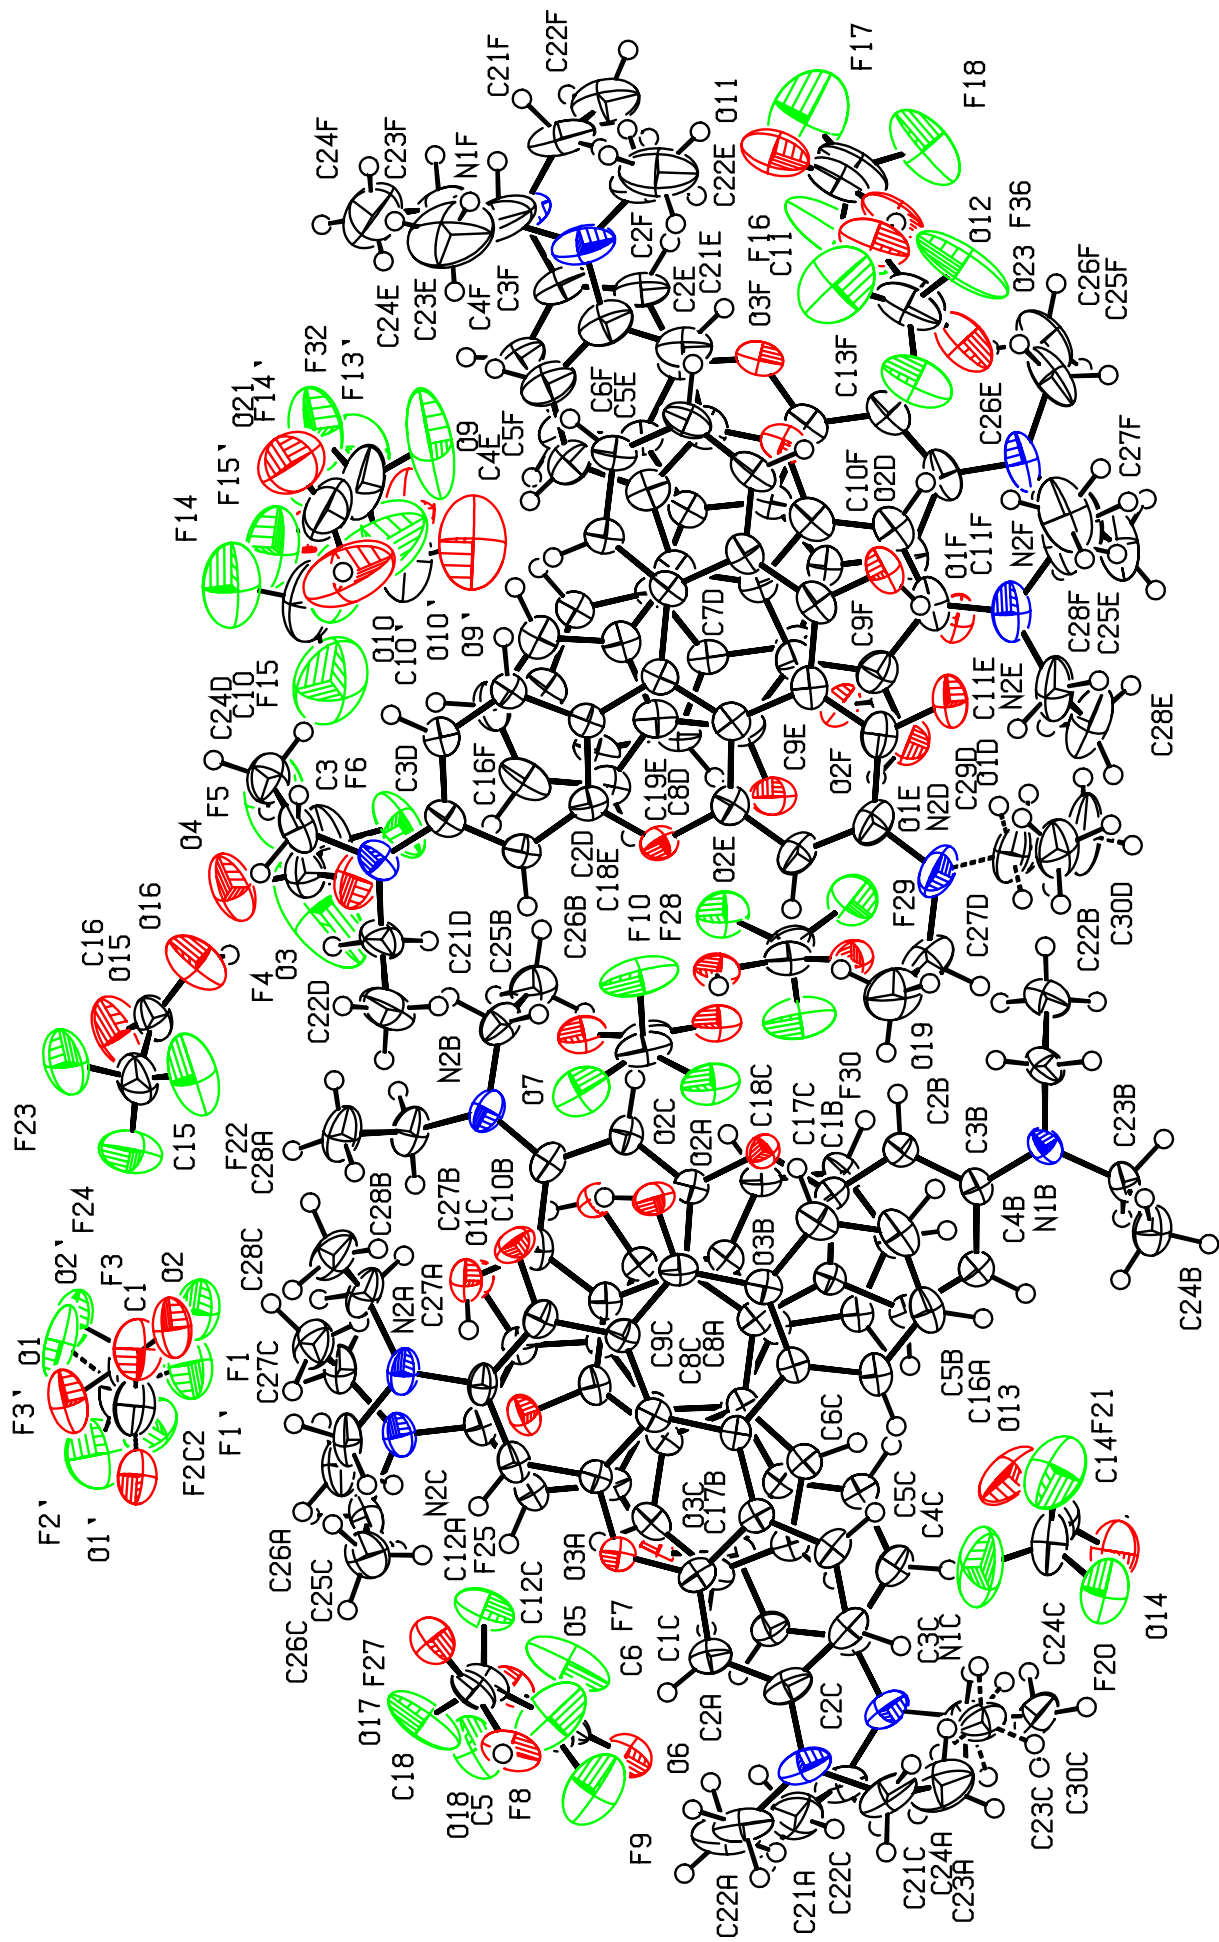

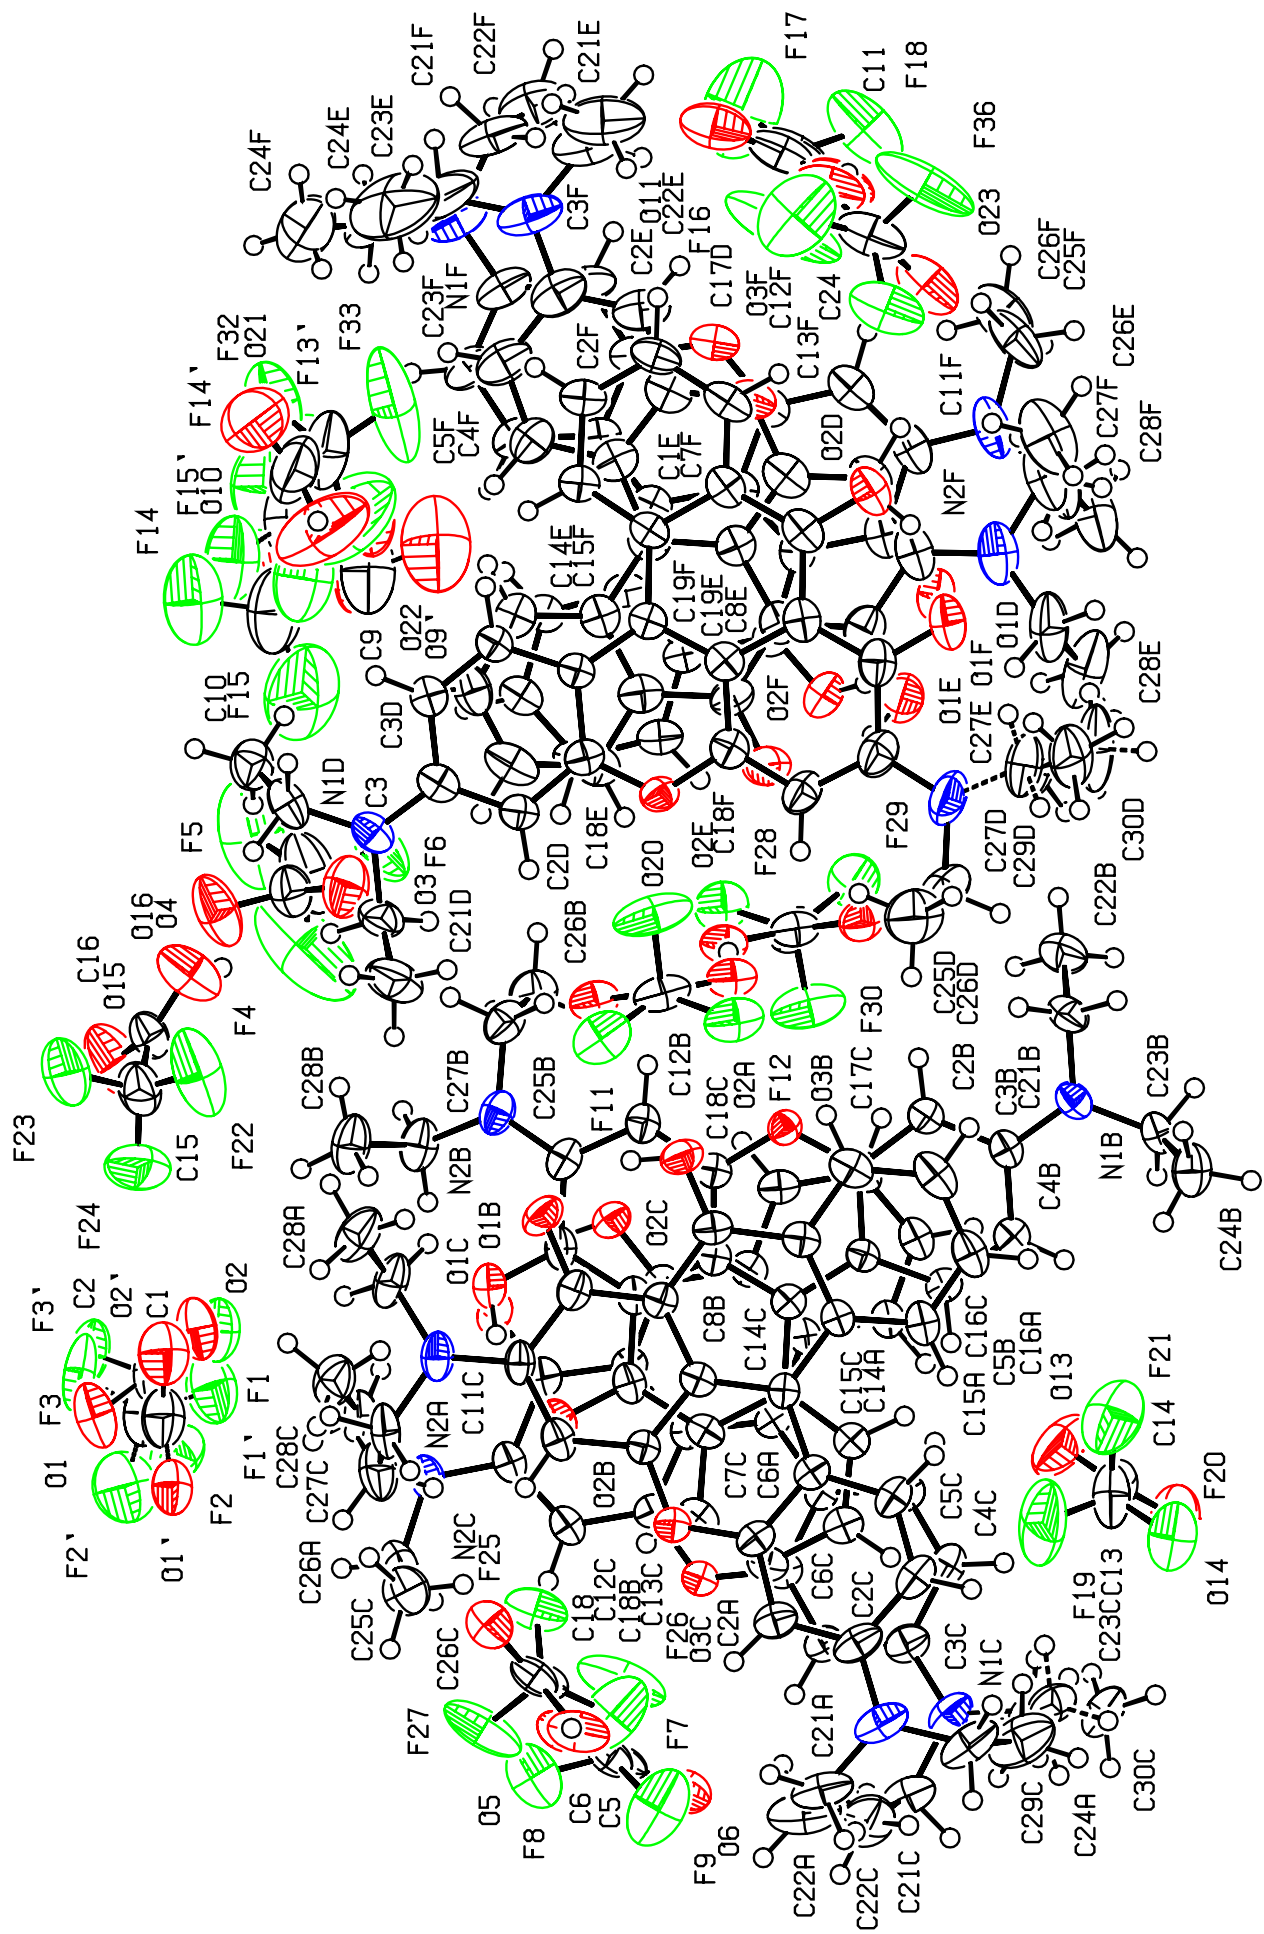

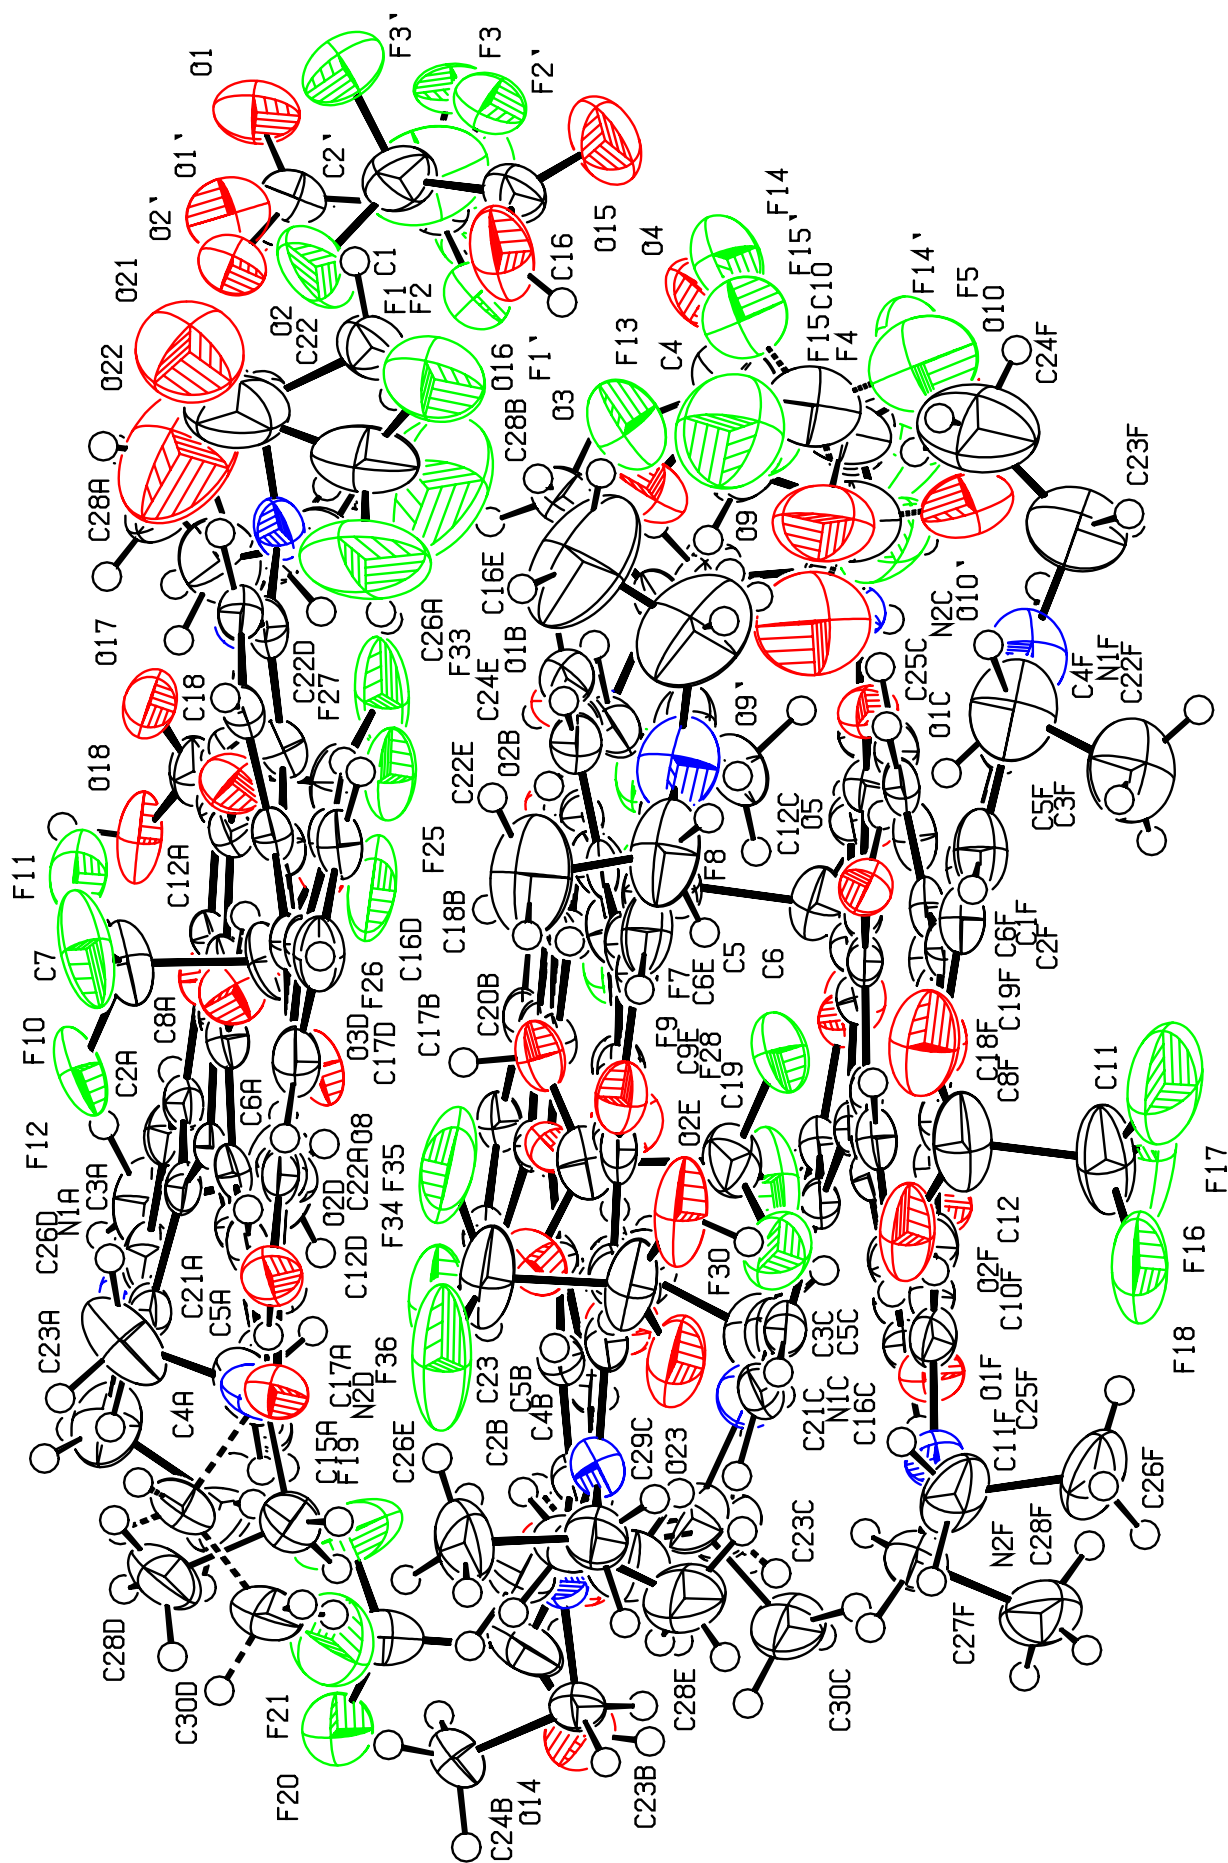

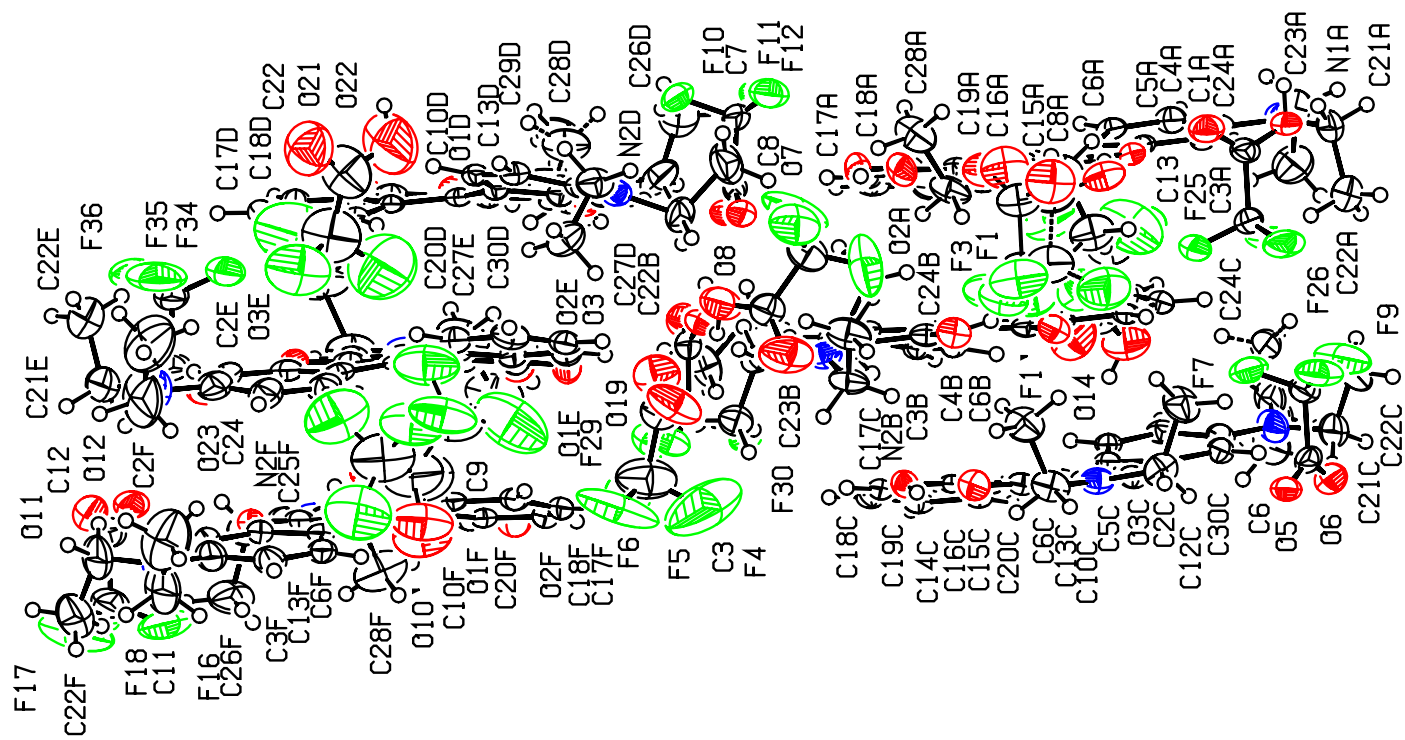

Supplement: d5cc01507c2.pdf [file d5cc01507c2.pdf]

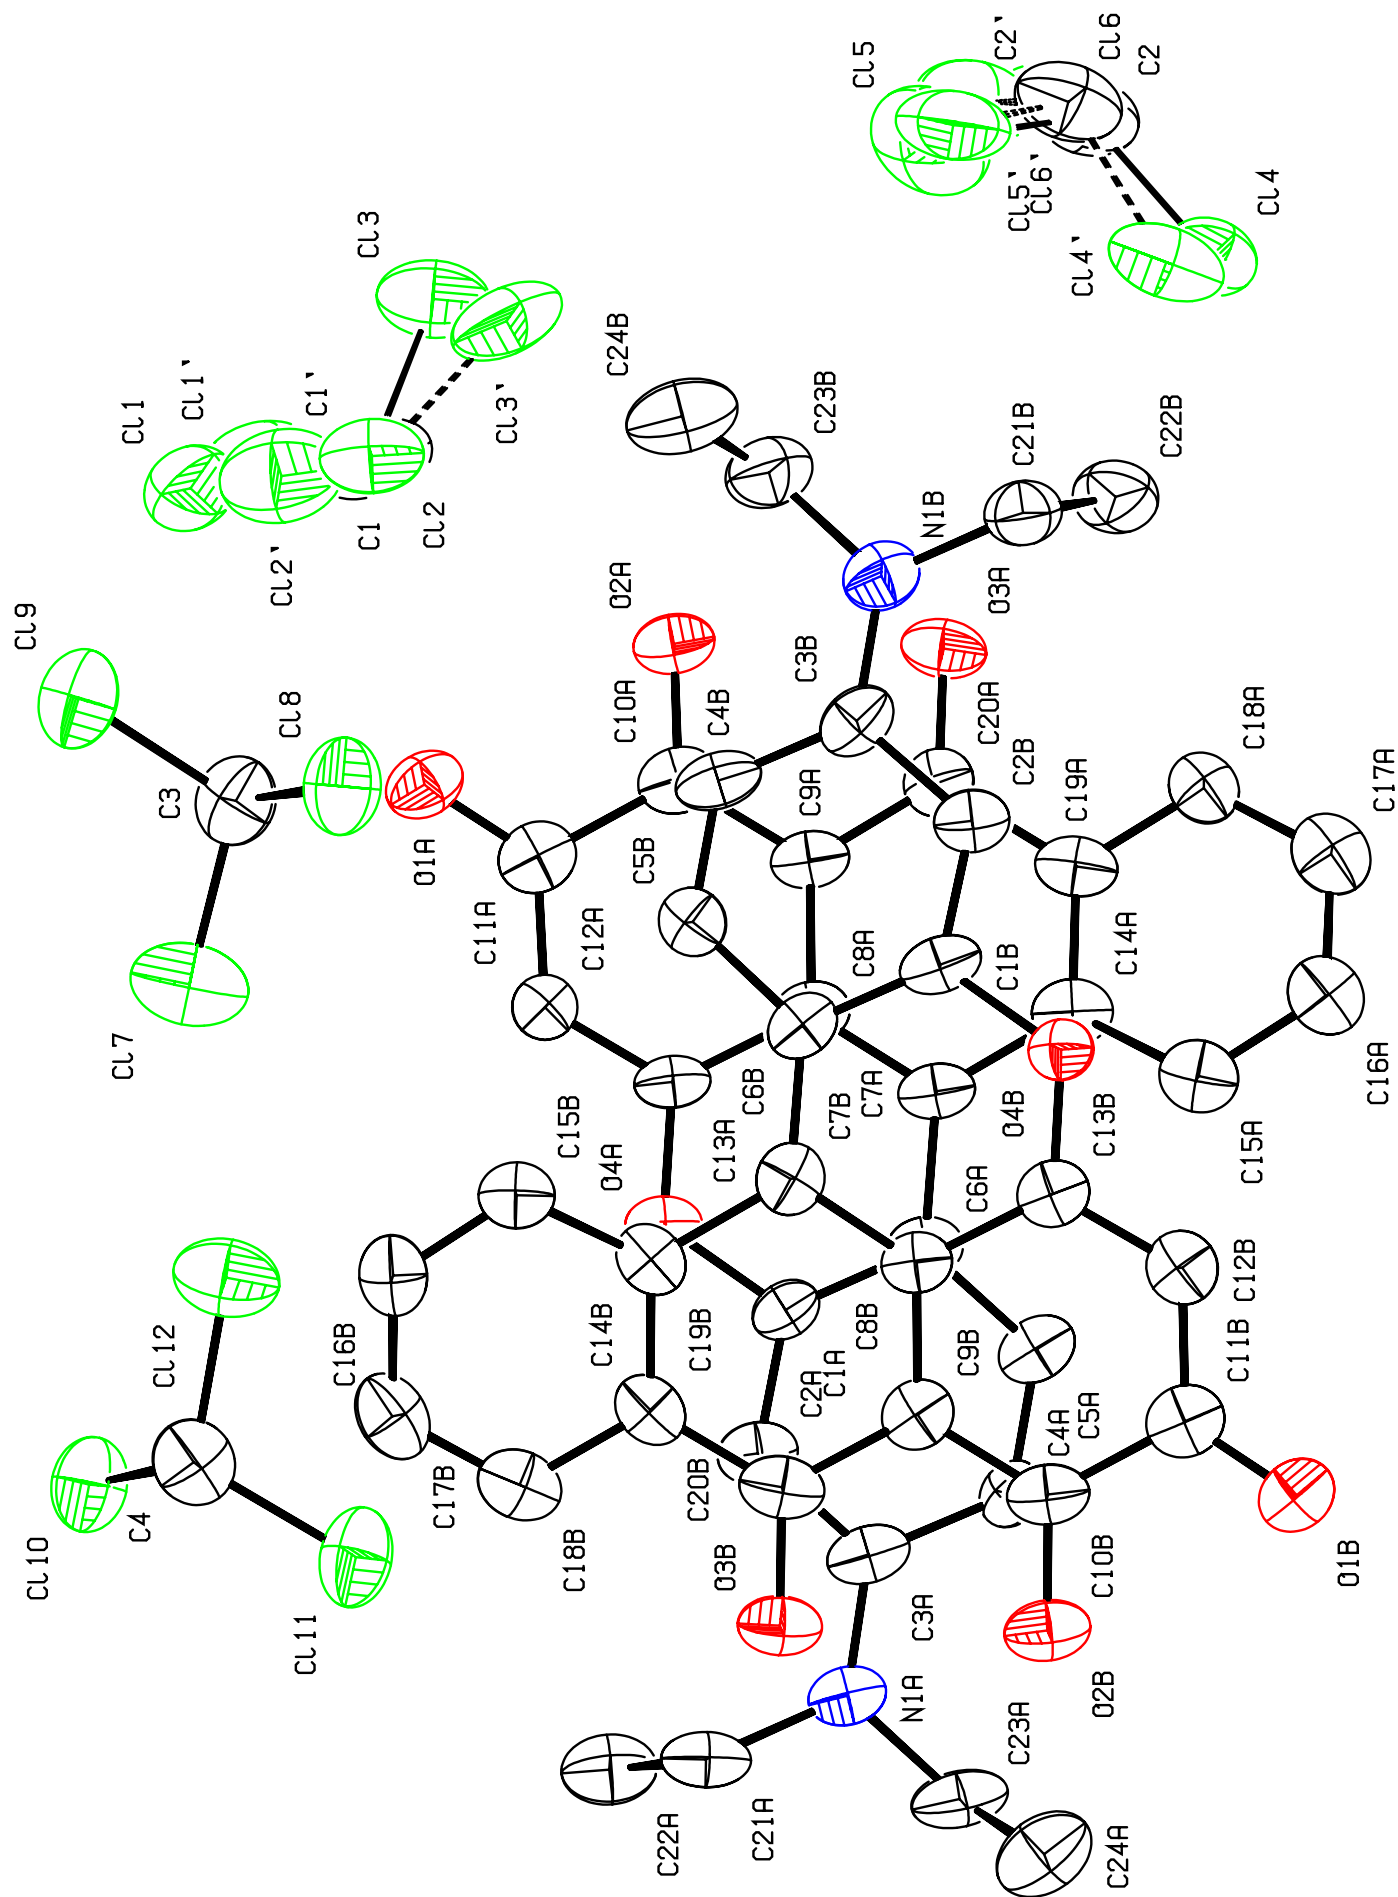

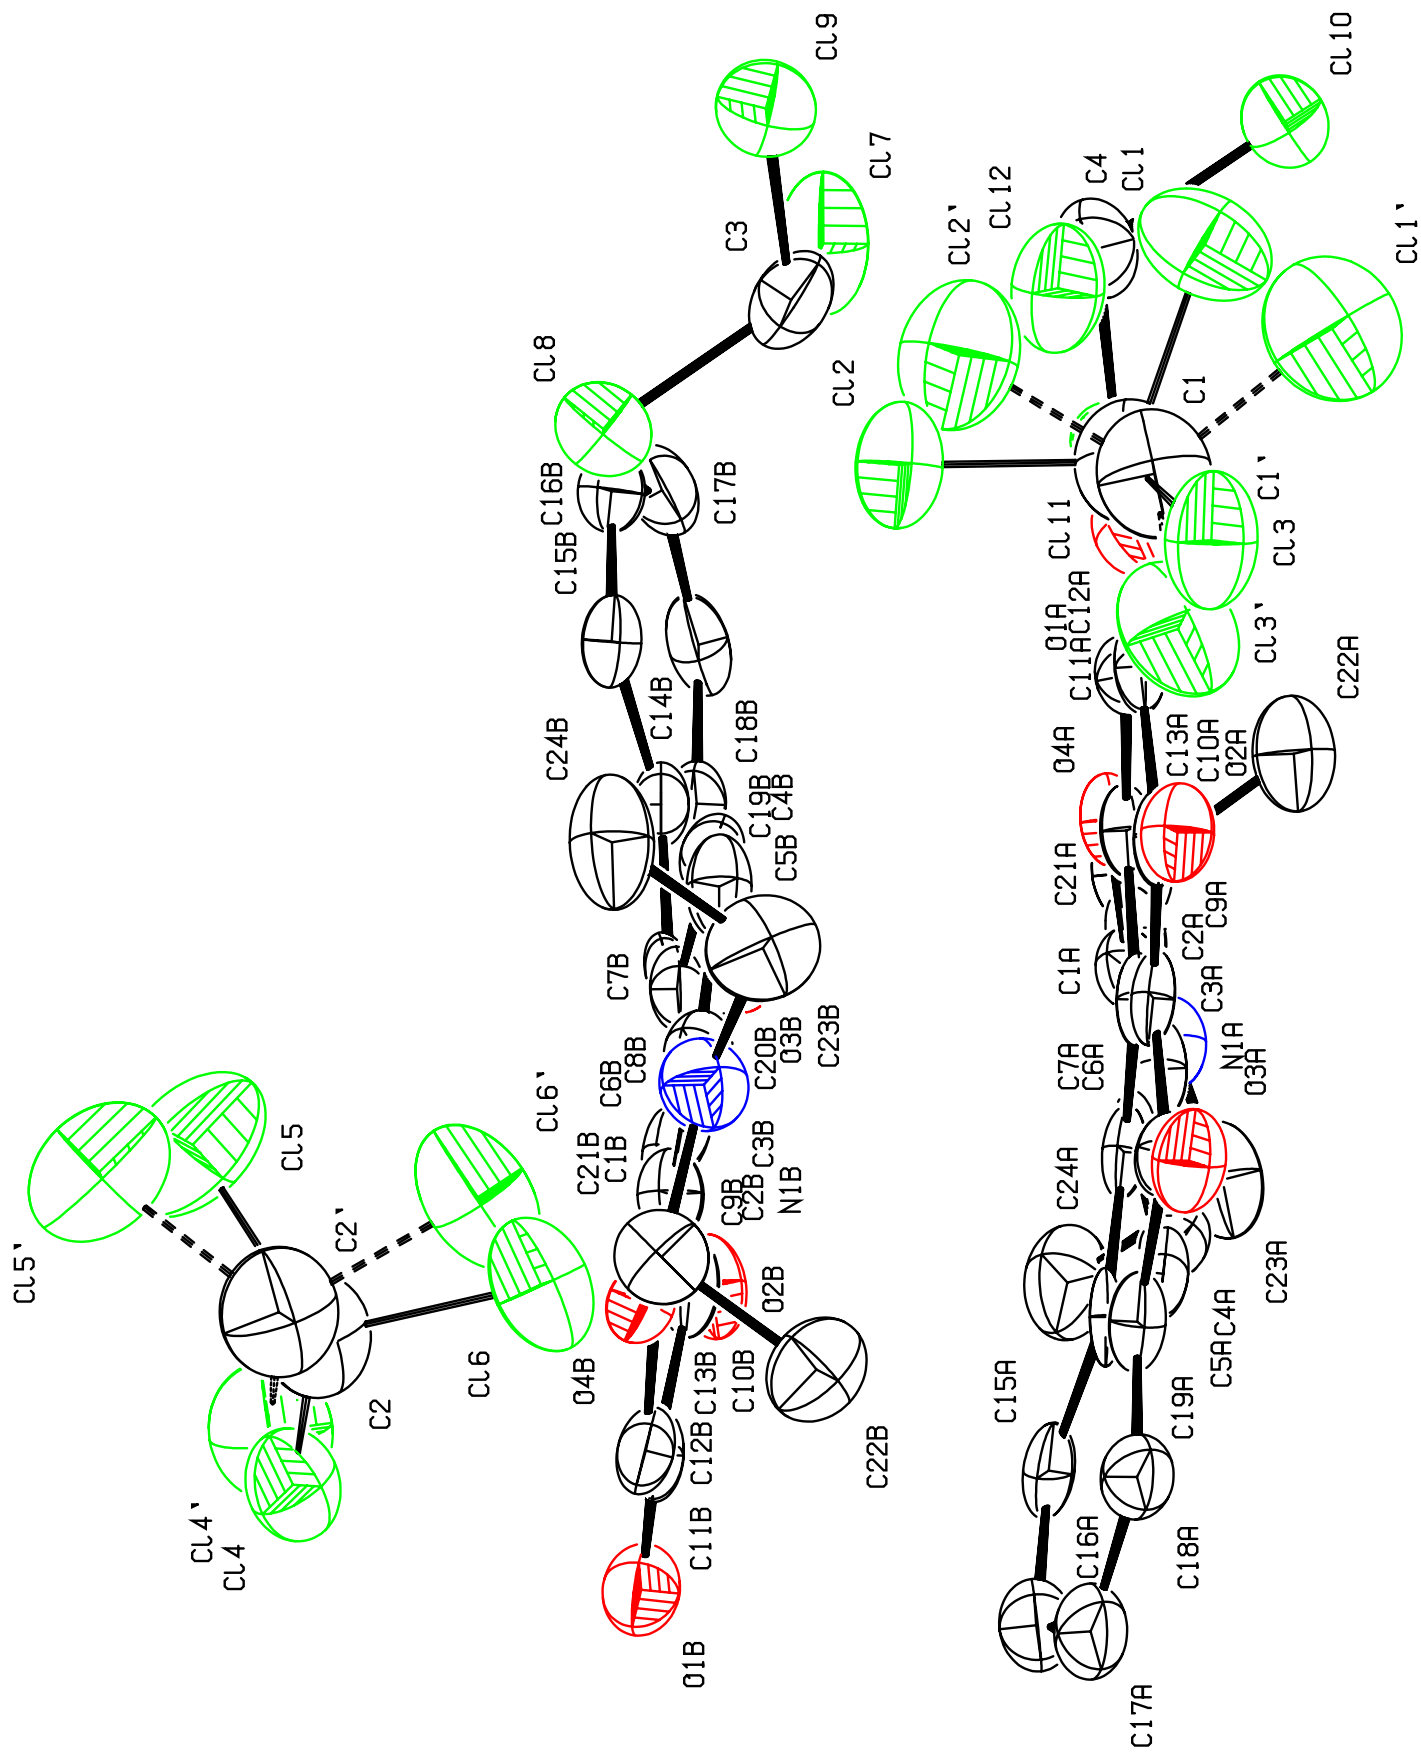

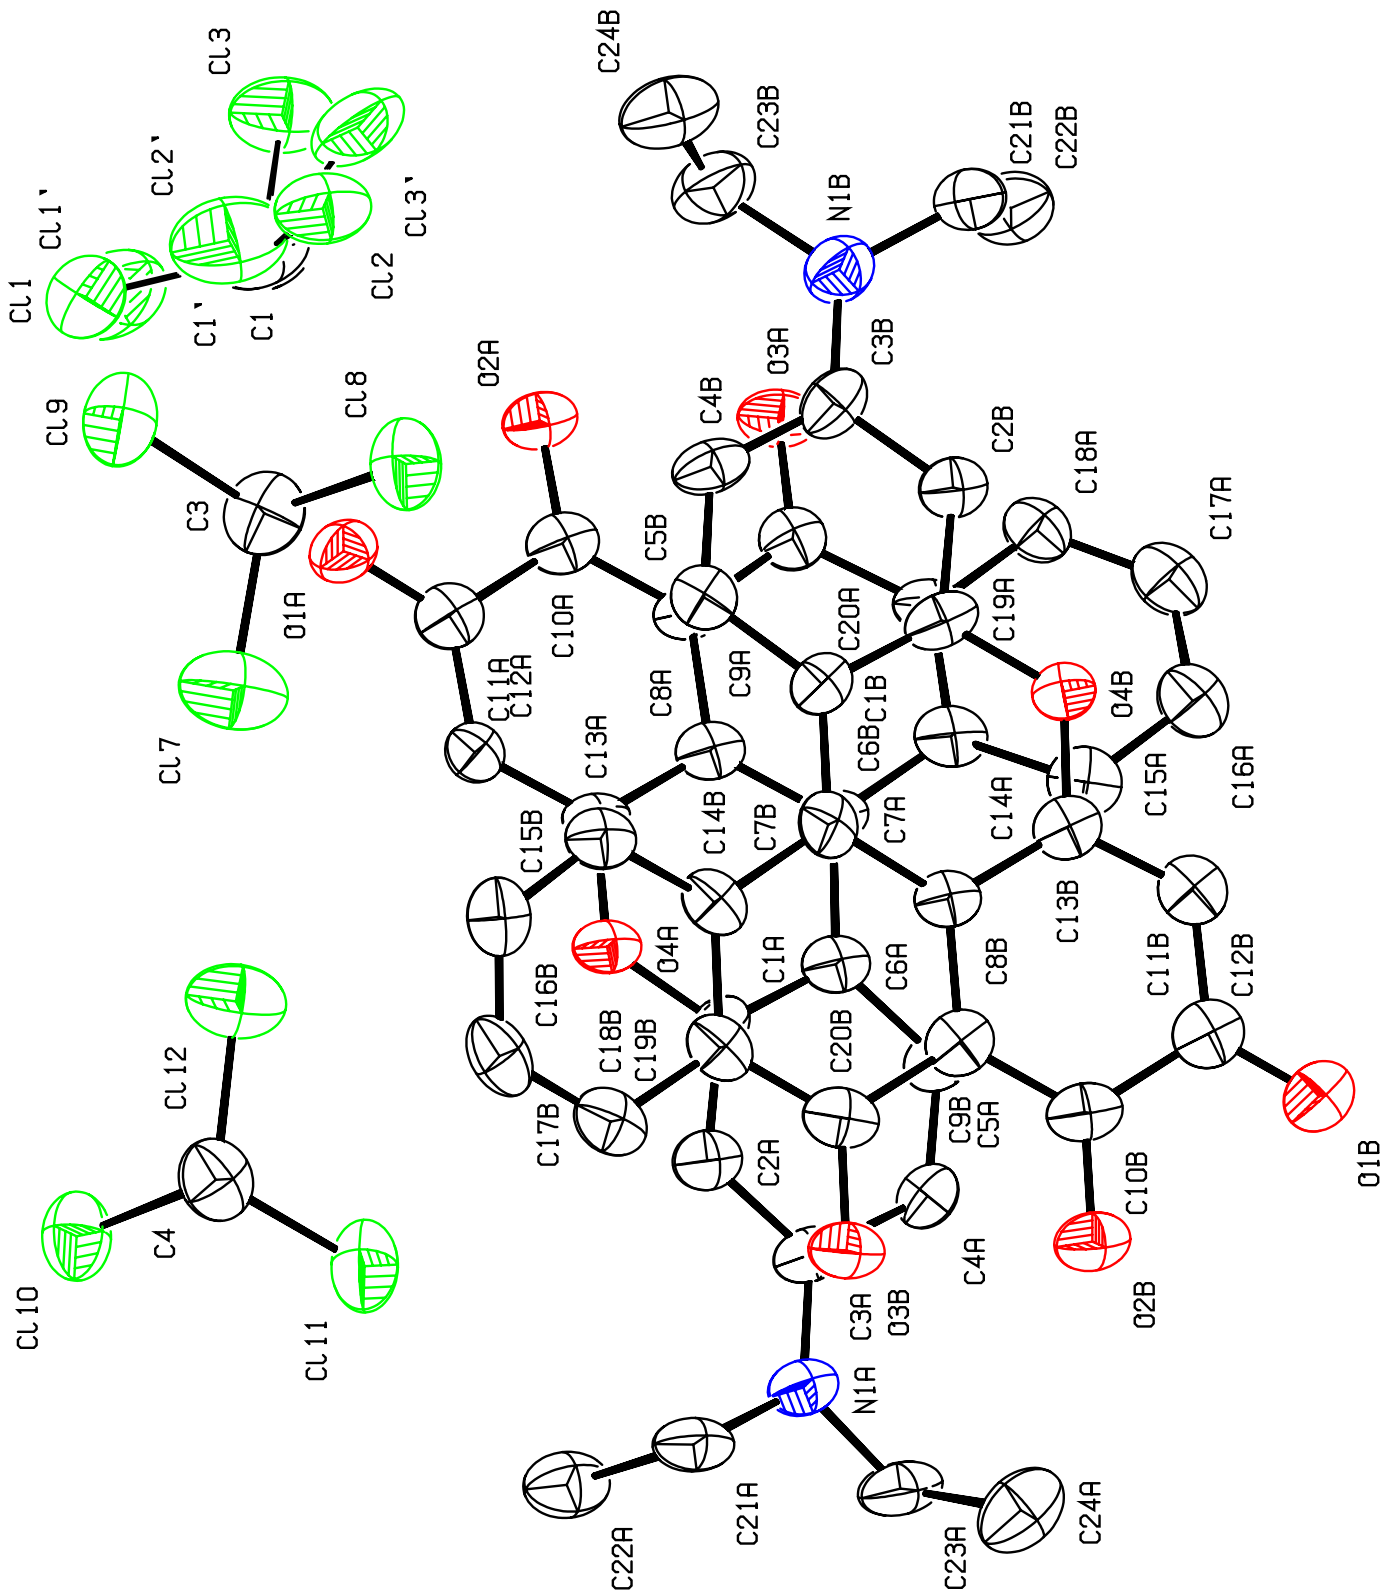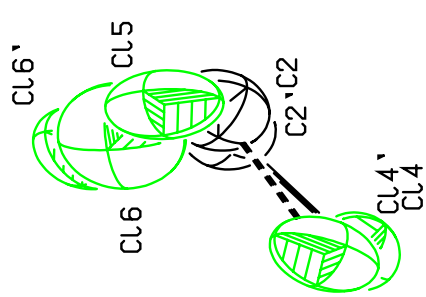

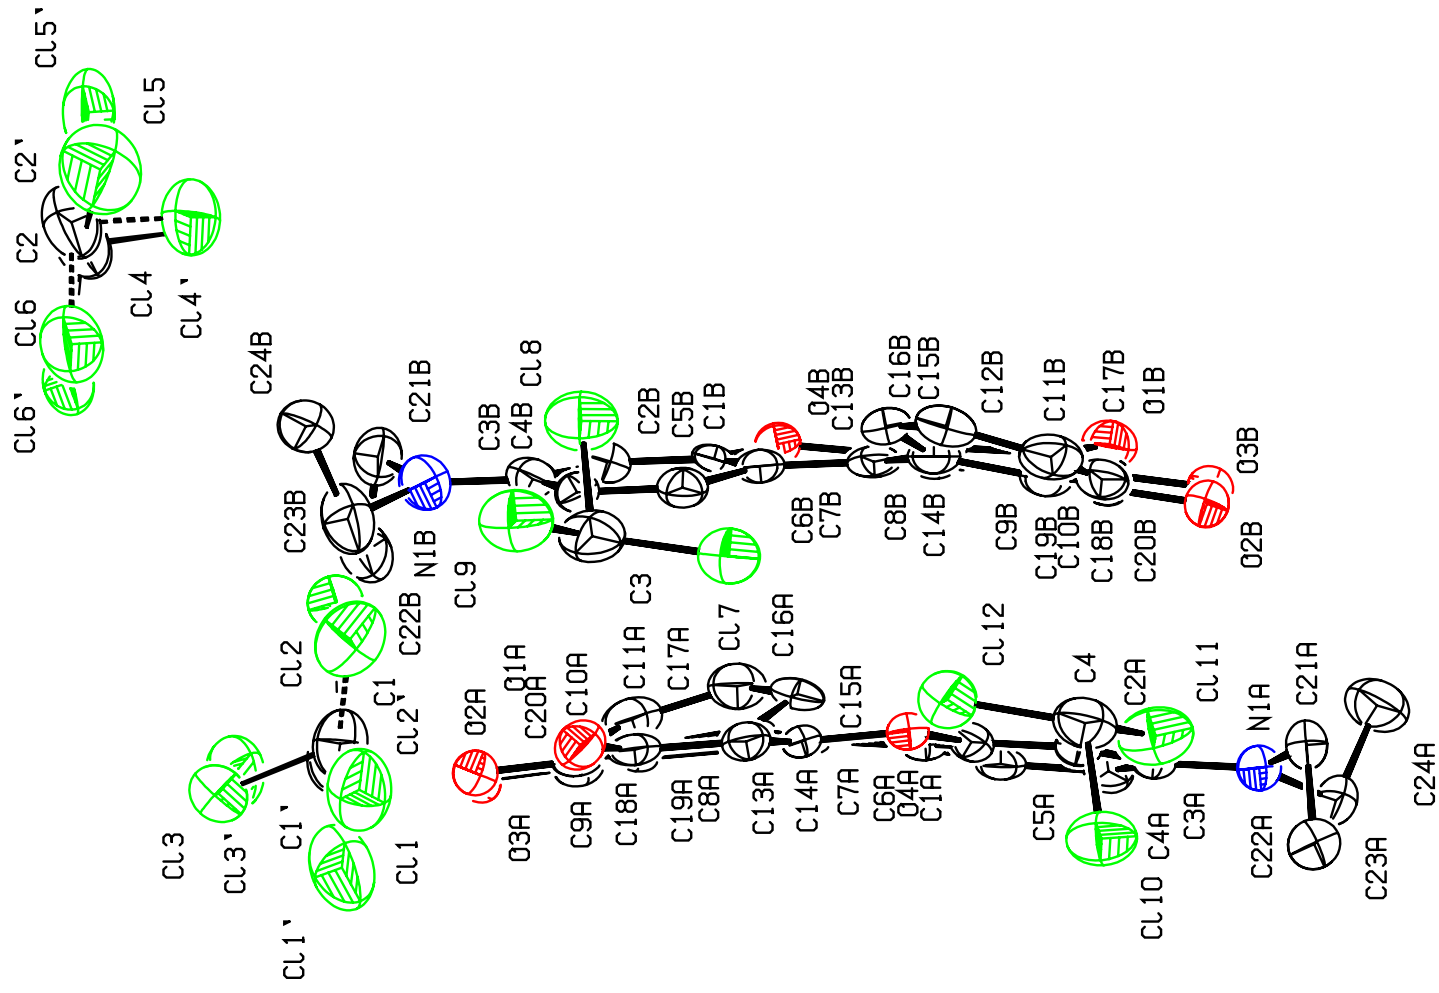

Supplement: d5cc01507c3.pdf [file d5cc01507c3.pdf]
